# Supplementary material
Source: PubMed Central journal article supplement (PMC139179)
Supplement: pnas_99_26_16537__2.pdf [file pnas_99_26_16537__2.pdf]

**Table 1. Strains and plasmids used in this study**

| Name       | Description                                                                                                                                               | Source/Ref.    |
|------------|-----------------------------------------------------------------------------------------------------------------------------------------------------------|----------------|
| Strain     | Genotype                                                                                                                                                  |                |
| FY250      | <i>MAT<math>\alpha</math> trp1<math>\Delta</math>63 his3<math>\Delta</math>200 ura3-52 leu2<math>\Delta</math>1 GAL<sup>+</sup></i>                       | D. McNabb      |
| FY251      | <i>MAT<math>\alpha</math> trp1<math>\Delta</math>63 his3<math>\Delta</math>200 ura3-52 leu2<math>\Delta</math>1 GAL<sup>+</sup></i>                       | M. Carlson     |
| V947Y      | <i>MAT<math>\alpha</math> ade4::P<sub>gal1</sub>-lexA-DHFR(HIS3) ade2::P<sub>gal1</sub>-B42-GR(TRP1) ura3-52 leu2<math>\Delta</math>1 GAL<sup>+</sup></i> | This study     |
|            |                                                                                                                                                           |                |
| Plasmid    | Details                                                                                                                                                   |                |
| p425 MET25 | <i>P<sub>met25</sub> 2<math>\mu</math> amp<sup>R</sup> LEU2 pUC ori</i>                                                                                   | H. Madhani/(5) |
| pVC167     | <i>P<sub>me25t</sub> 2<math>\mu</math> spec<sup>R</sup> LEU2 pUC ori</i>                                                                                  | This study     |
| pVC172     | <i>P<sub>met25</sub>/P99-His<sub>6</sub> 2<math>\mu</math> spec<sup>R</sup> LEU2 pUC ori</i>                                                              | This study     |
| pCB827     | <i>P<sub>met25</sub>/P99 Ser<sup>64</sup>→Ala cephalosporinase-His<sub>6</sub> 2<math>\mu</math> spec<sup>R</sup> LEU2 pUC ori</i>                        | This study     |
| pMW102     | <i>P<sub>gal1</sub>/B42 2<math>\mu</math> kan<sup>R</sup> TRP1 pUC ori</i>                                                                                | R. Brent/(6)   |
| pMW112     | <i><math>\delta</math>lexAop-lacZ 2<math>\mu</math> kan<sup>R</sup> pBR ori</i>                                                                           | R. Brent/(6)   |
| pMW3eDHFR  | <i>P<sub>adh</sub>/LexA-eDHFR 2<math>\mu</math> kan<sup>R</sup> HIS3 pBR ori</i>                                                                          | (1)            |
| pBC398     | <i>P<sub>gal1</sub>/B42-GR 2<math>\mu</math> kan<sup>R</sup> TRP1 pUC ori</i>                                                                             | (7)            |
| pKB521     | <i>P<sub>gal1</sub>/LexA-eDHFR 2<math>\mu</math> kan<sup>R</sup> HIS3 pBR ori</i>                                                                         | This study     |
| pNU602     | P99 cephalosporinase                                                                                                                                      | J. Frere       |
| pET26b     | <i>P<sub>T7</sub> kan<sup>R</sup> pBR ori</i>                                                                                                             | Novagen        |
| pSG430     | <i>P<sub>T7</sub> /P99 cephalosporinase-His<sub>6</sub> kan<sup>R</sup> pBR ori</i>                                                                       | This study     |
| pDS984     | <i>P<sub>T7</sub> /P99 Ser<sup>64</sup>→Ala cephalosporinase-His<sub>6</sub> kan<sup>R</sup> pBR ori</i>                                                  | This study     |
